# Supplementary material
Source: publisher site journal article supplement (https://www.spandidos-publications.com/5191/downloadSupplementary)

Figure S1. ROC curve of the CVVD, MRAVV and MDPTB between polypoid choroidal vasculopathy and age-related macular degeneration group. CVVD, central vortex vein diameter; MDPTB, mean diameter of the peripheral thickest branch; MRAVV, mean root area of the vortex vein; ROC, receiver operating characteristic.

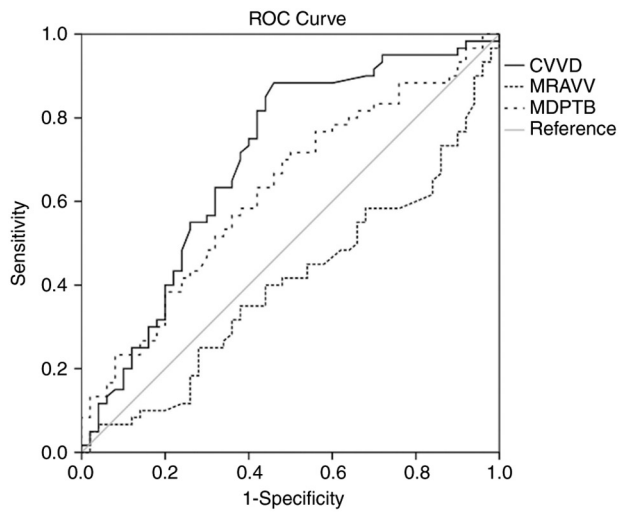

Supplement: Supplementary file 1 [file downloadSupplementary]
